# Supplementary material
Source: Springer Nature journal article supplement (https://www.springermedizin.de/resource/supplementary/12913_2008_778_MOESM4_ESM.pdf/9535534)

**Satisfaction with nurses (W1 & 4)**

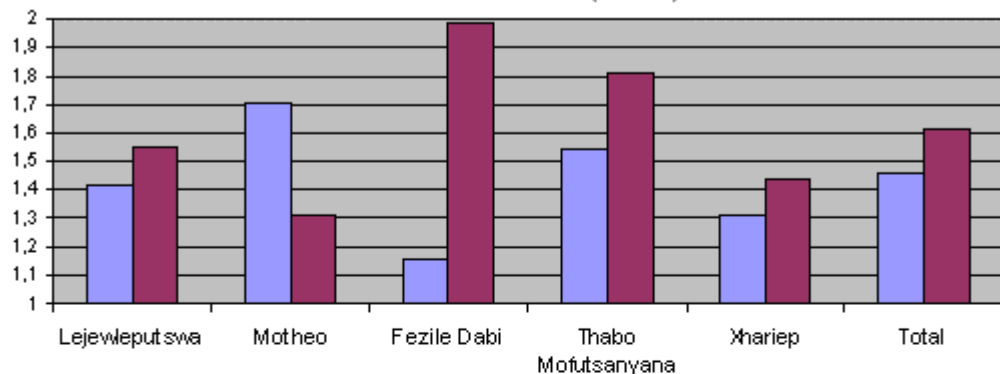

**Rate of filled posts (W1 & 4)**

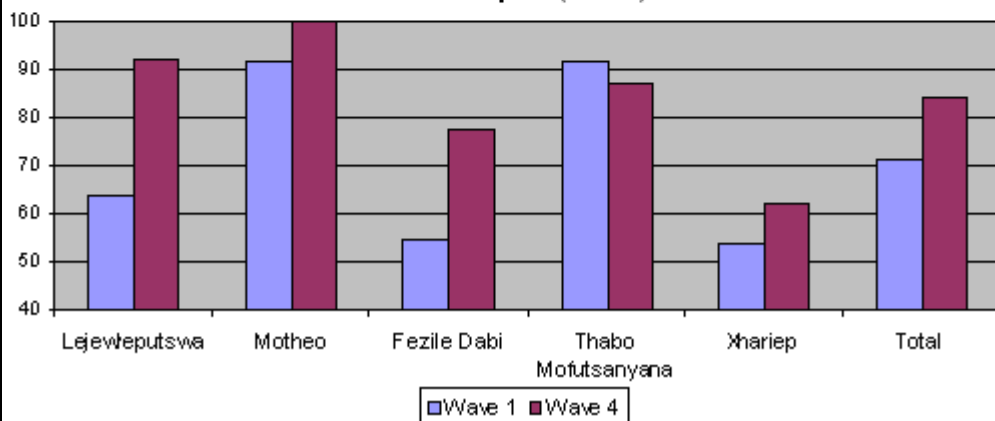

Supplement: MOESM4 [file 9535534]
